# Supplementary material for: Rational design of a junction structure to realize an NIR-selective narrowband organic thin-film photodiode
Source: Royal Society of Chemistry journal article supplement (doi:10.1039/c9tc00722a), 2019-01-01
Supplement: c9tc00722a1.pdf [file c9tc00722a1.pdf]

Electronic Supplementary Information (ESI)

**Rational Design of Junction Structure to Realize NIR-Selective  
Narrowband Organic Thin-Film Photodiode**

*Juhee Kim, Seongwon Yoon, Kyu Min Sim and Dae Sung Chung\**

Department of Energy Science & Engineering, Daegu Gyeongbuk Institute of  
Science & Technology (DGIST), Daegu 42988, Republic of Korea

\*Corresponding Author E-mail : [dchung@dgist.ac.kr](mailto:dchung@dgist.ac.kr)

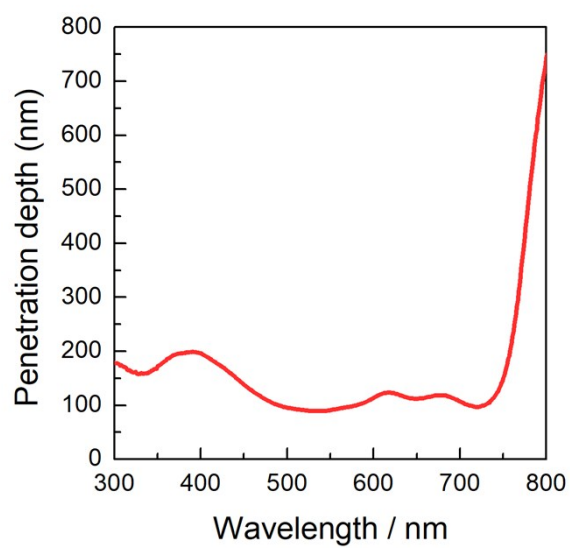

**Fig. S1** Calculated penetration depth of PCE10:P3HT p-complex film from Beer-Lambert law.

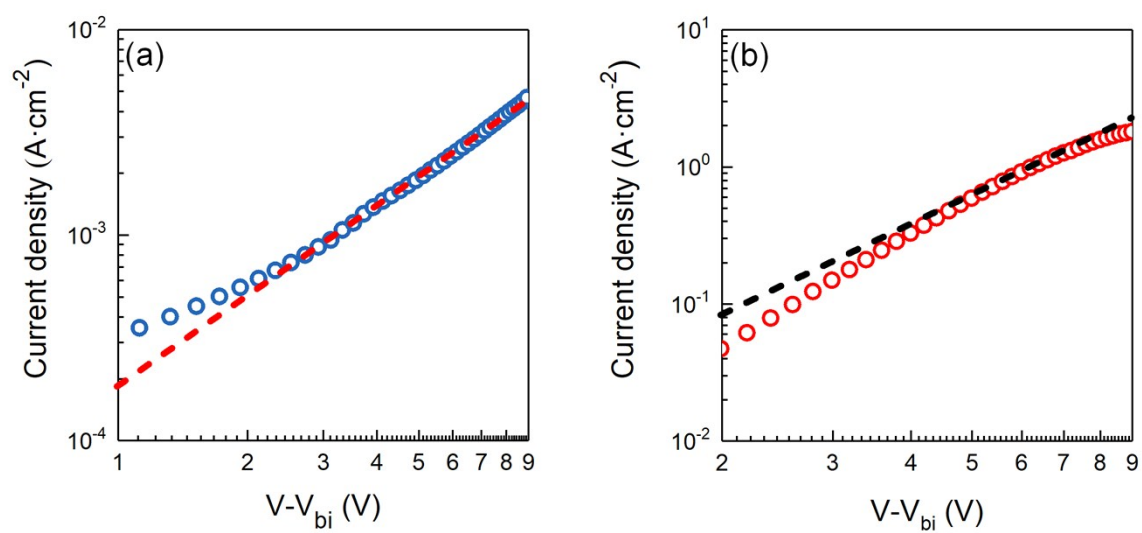

**Fig. S2** SCLC plots of (a) hole-only and (b) electron-only devices to extract hole and electron mobilities.

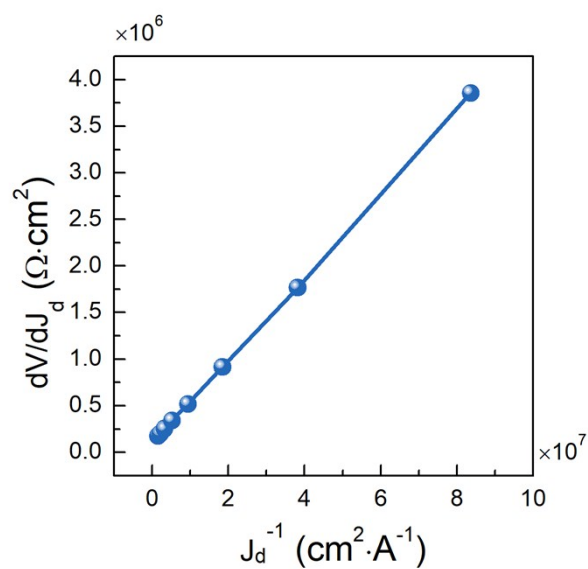

**Fig. S3**  $J_d^{-1}$  vs  $dV/dJ_d^{-1}$  plot to calculate ideality factor (dots and line correspond to experimental data and theoretical fitting, respectively).

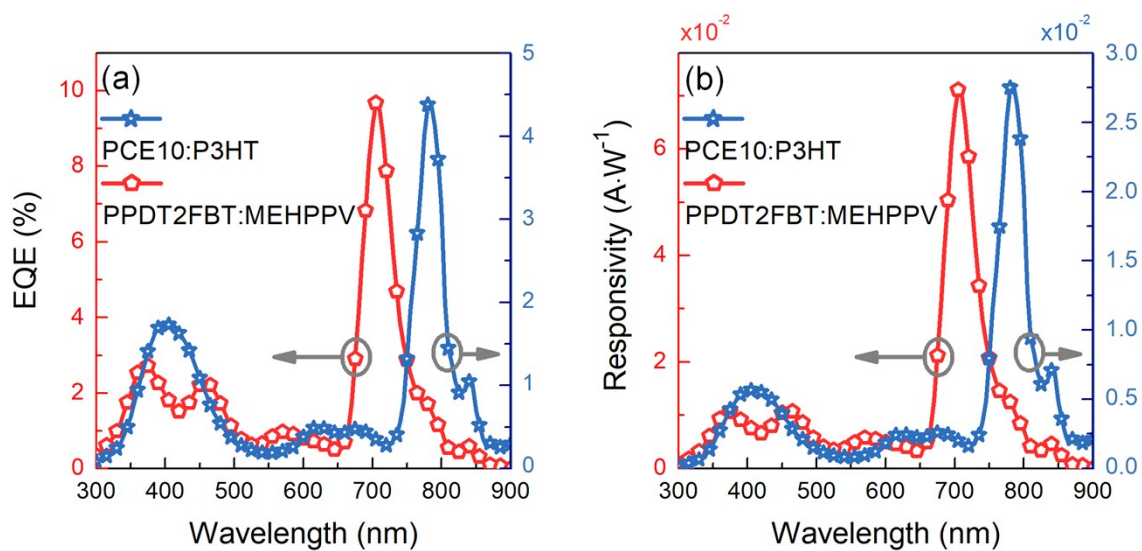

**Fig. S4** (a) The EQE and (b) responsivity spectra of optimized PCE10:P3HT and PPDT2FBT:MEH-PPV p-complexes photodiodes.

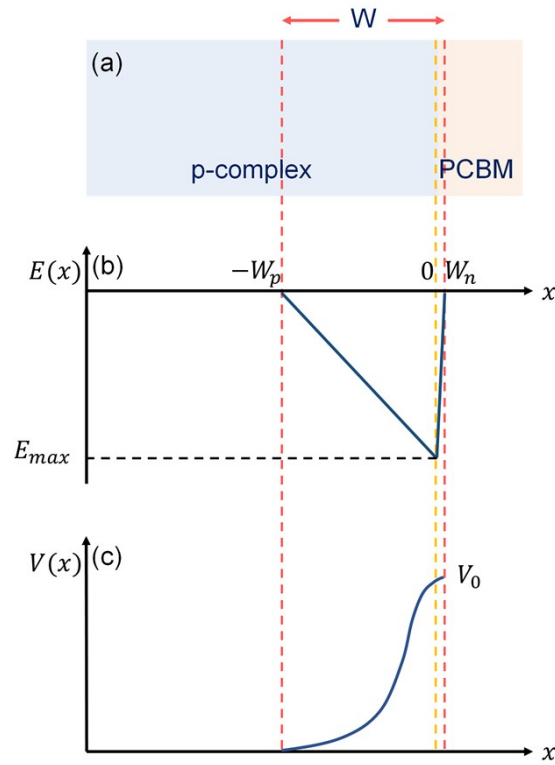

**Fig. S5** (a) Schematic description of abrupt PN junction used in this study. The corresponding (b) effective electric field distribution and (c) electric potential distribution.

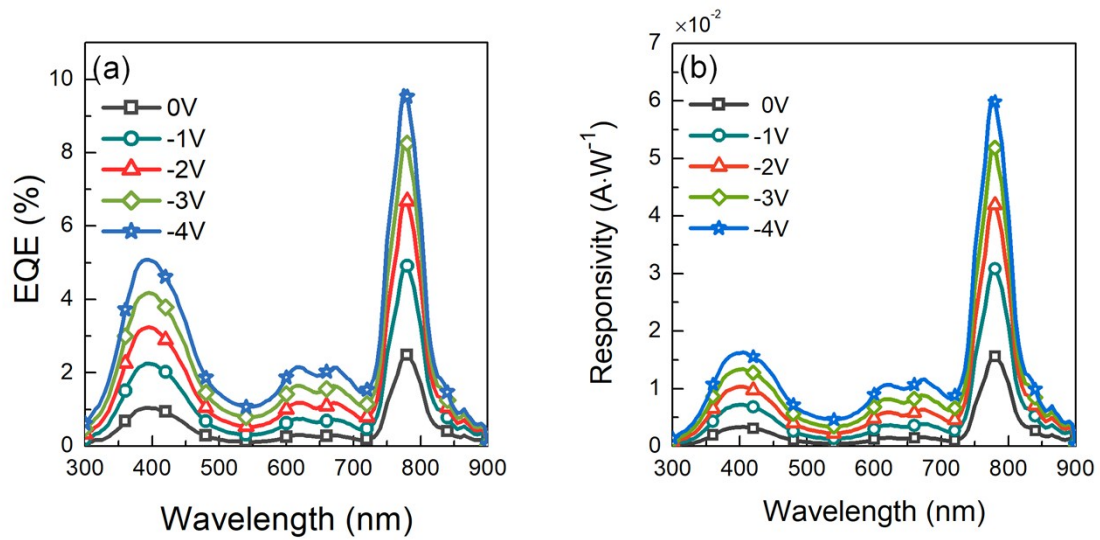

**Fig. S6** (a) The EQE and (b) responsivity spectra of PCE10:P3HT photodiode under different reverse biases.

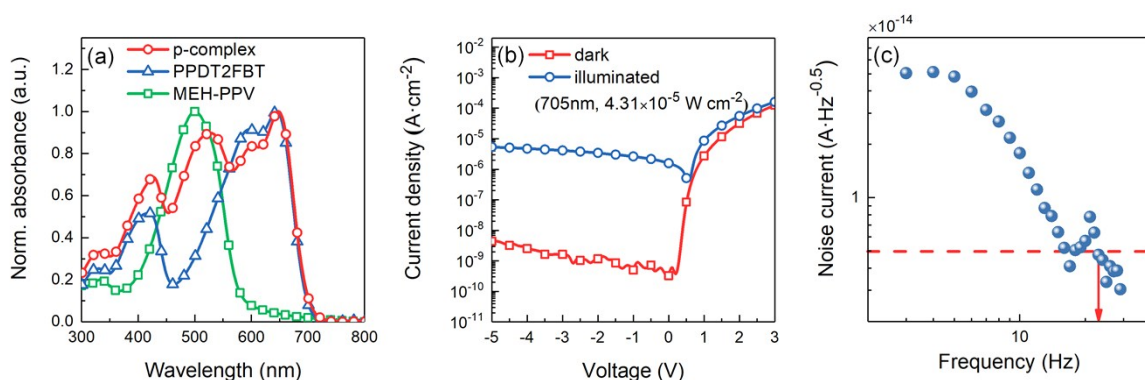

**Fig. S7** (a) UV-vis absorption spectra of pristine PPDT2FBT, MEH-PPV and their mixture (p-complex) films. (b) Measured dark and illuminated (780 nm wavelength and 25.7  $\mu\text{W cm}^{-2}$  intensity)  $J$ - $V$  characteristics and (c) Noise current spectrum of optimized photodiode which p-complex is PPDT2FBT:MEH-PPV. Noise current value was extracted at 23 Hz.

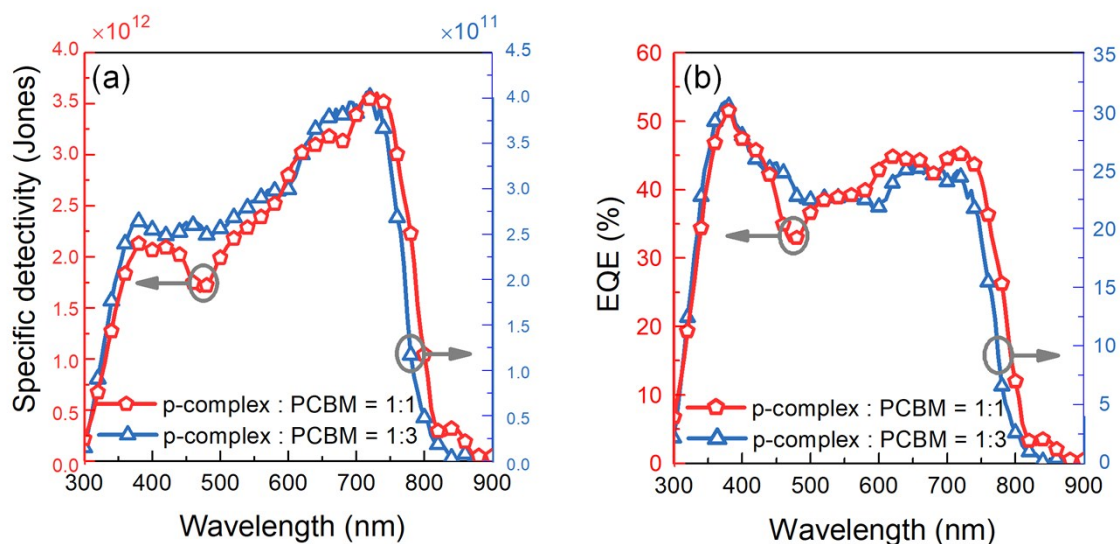

**Fig. S8** (a) The calculated detectivity spectra and (b) EQE spectra of BHJ photodiodes with different ratio of (PCE10:P3HT):PCBM = 1:1, 1:3 to show that NIR-selective mechanism is attributed to the rational design of junction structure of PHJ which selectively quenches non-desired visible photons even with thin film active layer thickness.
